# Supplementary material for: Changes in geriatric nutritional risk index and risk of major adverse cardiac and cerebrovascular events in incident peritoneal dialysis patients
Source: PubMed Central journal article supplement — Kidney Res Clin Pract. 2017 Dec 31;36(4):377–86. doi: 10.23876/j.krcp.2017.36.4.377 (PMC5743047; doi:10.23876/j.krcp.2017.36.4.377), 2017-12-31
Supplement: krcp-36-377_suppl.pdf [file krcp-36-377_suppl.pdf]

**Supplementary table 1. Comparison of baseline characteristics between included and excluded patients**

| Characteristic           | Included patient (n = 133) | Excluded patient (n = 73) | P value |
|--------------------------|----------------------------|---------------------------|---------|
| Age (yr)                 | 50.8 ± 11.9                | 63.5 ± 9.0                | 0.09    |
| Sex, men                 | 69 (51.9)                  | 45 (61.6)                 | 0.19    |
| Diabetes mellitus        | 20 (15.0)                  | 8 (11.0)                  | 0.09    |
| CVD*                     | 18 (13.5)                  | 10 (13.7)                 | 0.9     |
| Smoker                   | 40 (30.1)                  | 29 (39.7)                 | 0.16    |
| SBP (mmHg)               | 134.3 ± 21.1               | 134.6 ± 21.9              | 0.9     |
| Height (cm)              | 162.1 ± 8.1                | 163.1 ± 8.1               | 0.42    |
| Body weight (kg)         | 59.8 ± 10.2                | 61.4 ± 10.4               | 0.31    |
| Hemoglobin (g/L)         | 107 ± 15                   | 106 ± 14                  | 0.59    |
| BUN (mmol/L)             | 21.3 ± 6.7                 | 20.4 ± 5.6                | 0.33    |
| Creatinine (μmol/L)      | 875 ± 327                  | 946 ± 345                 | 0.79    |
| Albumin (g/L)            | 37 ± 5                     | 37 ± 3                    | 0.9     |
| Glucose (mmol/L)         | 5.3 ± 1.9                  | 5.7 ± 3.1                 | 0.12    |
| Calcium (mmol/L)         | 2.2 ± 0.2                  | 2.2 ± 0.2                 | 0.71    |
| Phosphorus (mmol/L)      | 1.6 ± 0.4                  | 1.6 ± 0.4                 | 0.82    |
| hs-CRP (mg/L)            | 1.2 (0.7–2.1)              | 1.5 (0.9–2.8)             | 0.04    |
| Medications              |                            |                           |         |
| RAS blockers             | 125 (94.0)                 | 69 (94.5)                 | 0.9     |
| Beta-blockers            | 91 (68.4)                  | 53 (72.6)                 | 0.52    |
| Calcium channel blockers | 104 (78.2)                 | 61 (83.6)                 | 0.36    |
| Diuretics                | 23 (17.3)                  | 11 (15.1)                 | 0.85    |
| Lipid lowering therapy   | 65 (48.9)                  | 35 (47.9)                 | 0.9     |
| GNRI                     | 96.2 ± 8.3                 | 95.6 ± 5.7                | 0.57    |

Values are presented as mean ± standard deviation, number of patients (percent), or median (interquartile range).

\*CVD: A composite of CAD, PAD, CVA, and CHF.

BUN, blood urea nitrogen; CAD, coronary artery disease; CHF, congestive heart failure; CVA, cerebrovascular accident; CVD, cardiovascular disease; GNRI, geriatric nutritional risk index; hs-CRP, high-sensitivity C-reactive protein; PAD, peripheral artery disease; RAS, renin-angiotensin system; SBP, systolic blood pressure.

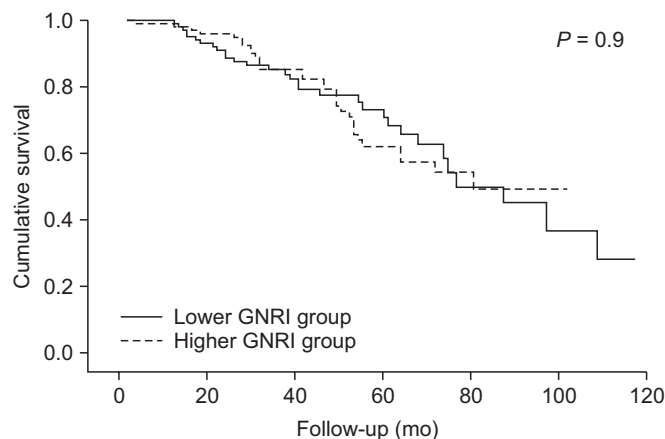

**Supplementary figure 1. Kaplan-Meier analysis of baseline GNRI groups for MACCE in 206 patients.** There was no significant association between baseline GNRI group and incidence of MACCE in 206 patients including the 73 excluded patients (log-rank test,  $P = 0.9$ ).

GNRI, geriatric nutritional risk index; MACCE, major adverse cardiac and cerebrovascular event.
